# Supplementary material for: Cell kinetics of auxin transport and activity in Arabidopsis root growth and skewing
Source: PubMed Central journal article supplement (PMC7954861; doi:10.1038/s41467-021-21802-3), 2021-03-12
Supplement: 41467_2021_21802_MOESM3_ESM.pdf [file 41467_2021_21802_MOESM3_ESM.pdf]

## Descriptions of Additional Supplementary Files

### Supplementary Movie 1

**Description:** Root growth in response to cell-type-specific IAA induction. Red: 35S:H2B-RFP (marking nuclei); green: DR5:VENUS. Control (con): pWOX5:XVE:YUC1-TAA1; DR5:VENUS roots without estradiol treatment. Upon estradiol treatment, the indicated promoters express YUC1-2A-TAA1. T0 is 20 min following estradiol treatment. Scale bar = 200  $\mu\text{m}$ .

### Supplementary Movie 2

**Description:** Single-nuclei image analysis detection in response to cell-type-specific IAA induction. Red: 35S:H2B-RFP (marking nuclei). Control (con): pWOX5:XVE:YUC1-TAA1; DR5:VENUS roots without estradiol treatment. Upon estradiol treatment, the indicated promoters express YUC1-2A-TAA1. T0 is 20 min following estradiol treatment. Scale bar = 200  $\mu\text{m}$ .

### Supplementary Movie 3

**Description:** Tracking of individual nuclei over time and space. Time is indicated by the rainbow scale (0-6 h). Control (con): pWOX5:XVE:YUC1-TAA1; DR5:VENUS roots without estradiol treatment. Upon estradiol treatment, the indicated promoters express YUC1-2A-TAA1. T0 is 20 min following estradiol treatment. Scale bar = 200  $\mu\text{m}$ .

### Supplementary Movie 4

**Description:** Monitoring auxin-dependent root skewing dynamics using long-term vertical-stage microscopy of UV laser ablation sites(19 h). Col-0 Mock-treated (left) 1  $\mu\text{m}$  NAA-treated (right) roots are shown. Time in hours is shown at the top. Black spots indicate for laser ablated cells. Scale bar = 25  $\mu\text{m}$ .

### Supplementary Movie 5

**Description:** Monitoring auxin-dependent root skewing dynamics using long-term vertical-stage microscopy of UV laser ablation sites(25 h). Col-0 Mock-treated (left) 1  $\mu\text{m}$  NAA-treated (right) roots are shown. Time in hours is shown at the top. Black spots indicate for laser ablated cells. Scale bar = 33  $\mu\text{m}$ .

### Supplementary Movie 6

**Description:** Single-nuclei tracking routes of meristem and elongation zones. Shown are cells at the meristem zone (MZ) and elongation zone (EZ). Rainbow scale indicates time; T0 is 20 min following mock or estradiol treatment. "Mock" indicates pWOX5:YUC1-TAA1; DR5:VENUS seedlings with no estradiol treatment. Time is indicated by the rainbow scale. Scale bars = 50  $\mu\text{m}$ .

### Supplementary Movie 7

**Description:** Tracking cell-type-specific auxin-dependent root skewing using long-term verticalstage microscopy. Control (pWOX5:XVE:YUC1-TAA1); DR5:VENUS roots without estradiol treatment. Upon estradiol treatment, the indicated promoters express YUC1-2A-TAA1. Time from estradiol (E2) treatment is shown at the top. Black spots indicate for laser ablated cells. Scale bar = 33  $\mu\text{m}$
